# Supplementary material
Source: publisher site journal article supplement (https://www.dovepress.com/article/297270)
Supplement: Supplementary file 1 [file get_supplementary_file.php]

Supplementary table 1. The R.E.N.A.L. nephrometry score system

| Component | 1pt | 2pts | 3pts |
| --- | --- | --- | --- |
| (R)adius (maximal diameter in cm) | ≤4 | >4 but <7 | ≥7 |
| (E)xophytic/endophytic properties | ≥50% | <50% | Entirely endophytic |
| (N)earness of tumor deepest portion to the collecting system or sinus (mm) | ≥7 | >4 but <7 | ≤4 |
| (A)nterior/Posterior | No points given. Mass assigned a descriptor of A, P, or X | | |
| (L)ocation relative to the  polar lines (suffix “h” assigned  if the tumor touches the  main renal artery or vein) | Entirely above  the upper or  below the  lower polar  line | Lesion crosses  polar line | >50% of mass is across polar line or mass crosses the axial renal midline or mass is entirely between  the polar lines |

Supplementary table 2. Complications

| Clavien-Dindo  Classification | LOE of  one day, n | LOE over  one day, n |
| --- | --- | --- |
| Total | 24 | 31 |
| Grade I | 19 | 26 |
| Pyrexia (antipyretics) | 5 | 6 |
| Emesis (antiemetics) | 9 | 9 |
| Diuretics | 1 | 3 |
| Analgesics | 4 | 8 |
| Grade II | 4 | 5 |
| Hemostatic | 4 | 2 |
| Blood transfusions | - | 3 |
| Grade IIIa | 1 | - |
| Radiologic intervention  (readmission due to  gross hematuria) | 1 | - |
